# Supplementary material
Source: MDPI journal article supplement (https://www.mdpi.com/2073-4344/13/11/1426)
Supplement: s1 [file s1]

*Supplementary Materials*

# Constructing Stable $\text{MoO}_x\text{-NiS}_x$ Film via Electrodeposition and Hydrothermal Method for Water Splitting

Shihu Zhu <sup>1,2</sup>, Tiantian Liu <sup>1,3</sup>, Shuang Yu <sup>1,3</sup>, Huijing Yang <sup>1,3</sup>, Qimeng Sun <sup>1,3</sup> and Jin You Zheng <sup>1,3,\*</sup>

<sup>1</sup> Engineering Research Center of Advanced Functional Material Manufacturing of Ministry of Education, School of Chemical Engineering, Zhengzhou University, Zhengzhou 450001, China; 15638216421@163.com (S.Z.); ltt13429817116@163.com (T.L.); shuangyu\_225@163.com (S.Y.); huiging@163.com (H.Y.); qimeng\_sun1@163.com (Q.S.)

<sup>2</sup> School of Mechanical and Power Engineering, Zhengzhou University, Zhengzhou 450001, China

<sup>3</sup> National Key Laboratory of Coking Coal Green Process Research, Zhengzhou University, Zhengzhou 450001, China

\* Correspondence: jinyouzh@zzu.edu.cn

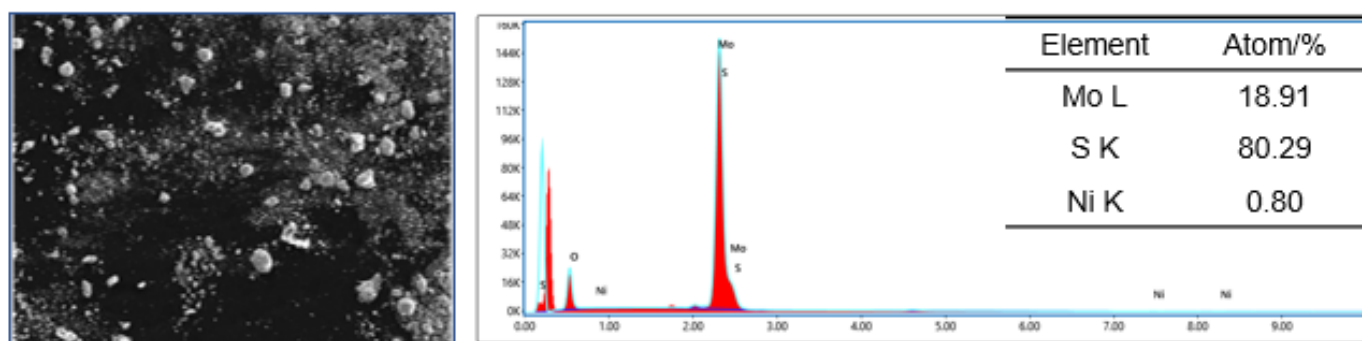

**Figure S1.** EDS spectrum of the 1H5E-CC intermediate products.

1H5E-CC was prepared by electrodeposition and hydrothermal reaction, finally we collected the precipitate. The deposition bath containing 0.05 M  $\text{Na}_2\text{SO}_4$ , 0.5 M  $\text{H}_3\text{BO}_3$ , and 0.1 M  $\text{Na}_2\text{SO}_4$ , and depositing was performed at room temperature in constant current way at  $-100$  mA for 5 min. Then 0.01 M ammonium tetrathiomolybdate and 0.5 M thiourea were dissolved in 50 mL DI water, and the mixed solution was stirred at room temperature for 30 min. Then sample and mixed solution were transferred into a 100 mL Teflon-lined stainless steel autoclave and maintained at  $180$  °C for 1 h. In the end, collecting the precipitate by suction filtration and drying.

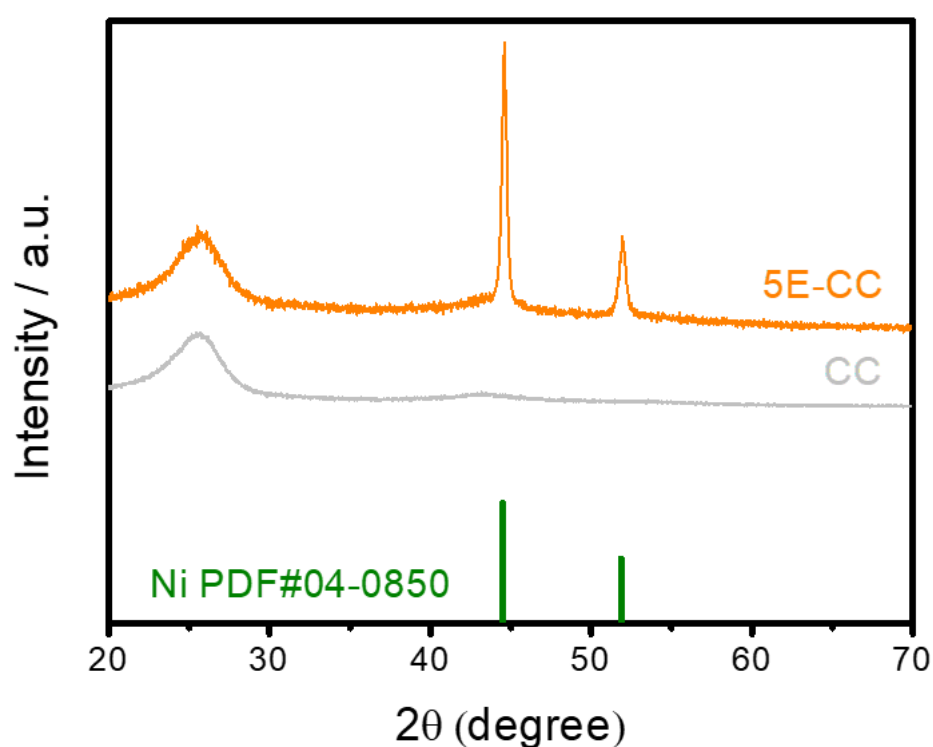

**Figure S2.** XRD patterns of 5E-CC and CC.

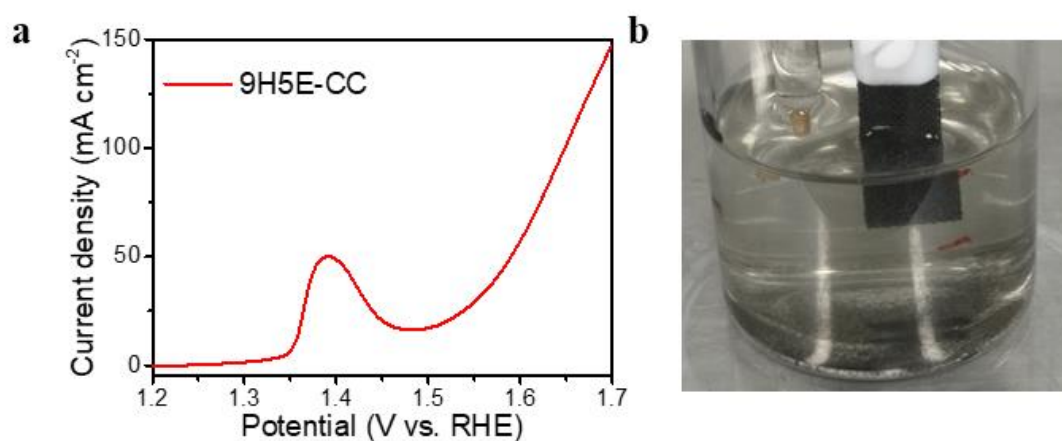

**Figure S3.** Polarization curve of 9H5E-CC for OER. (a) Polarization curve, (b) Photographic image of 9H10E-CC at OER process.

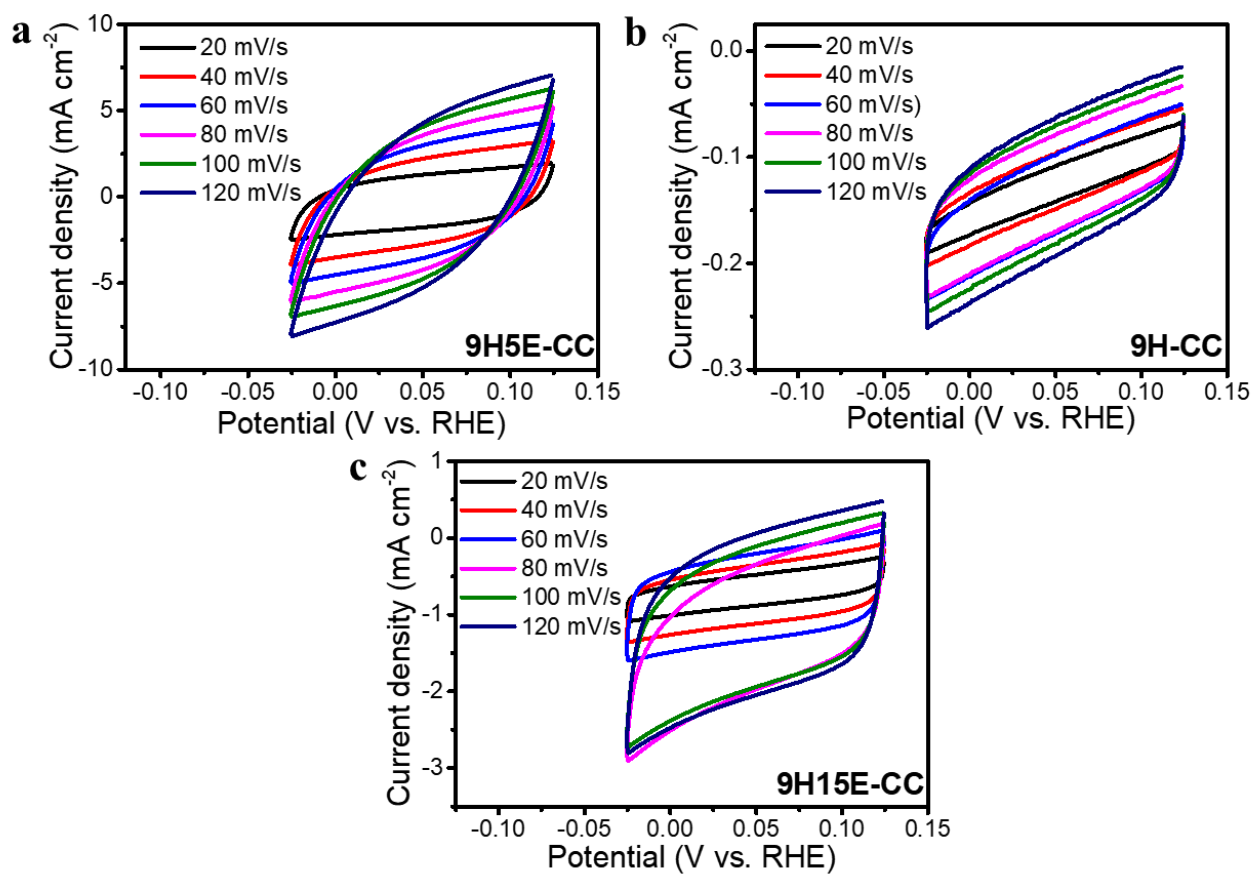

**Figure S4.** CV curves showing the capacitive of  $C_{dl}$  of (a) 9H5E-CC, (b) 9H-CC, and (c) 9H15E-CC.

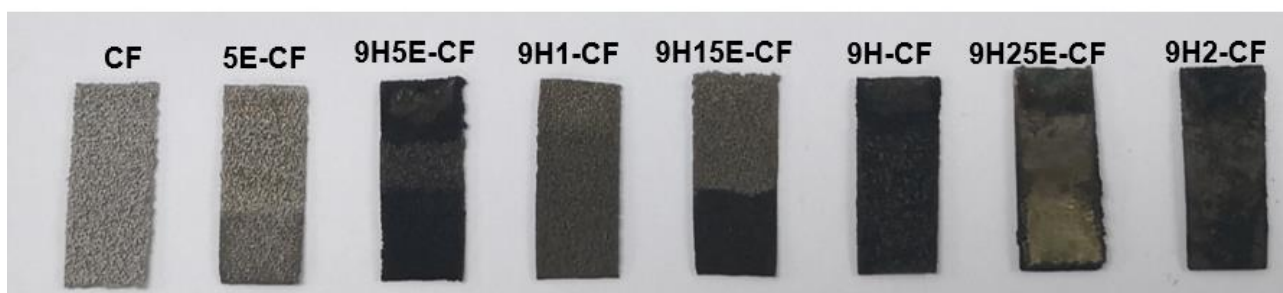

**Figure S5.** Photographic images of the as-prepared samples on CF.

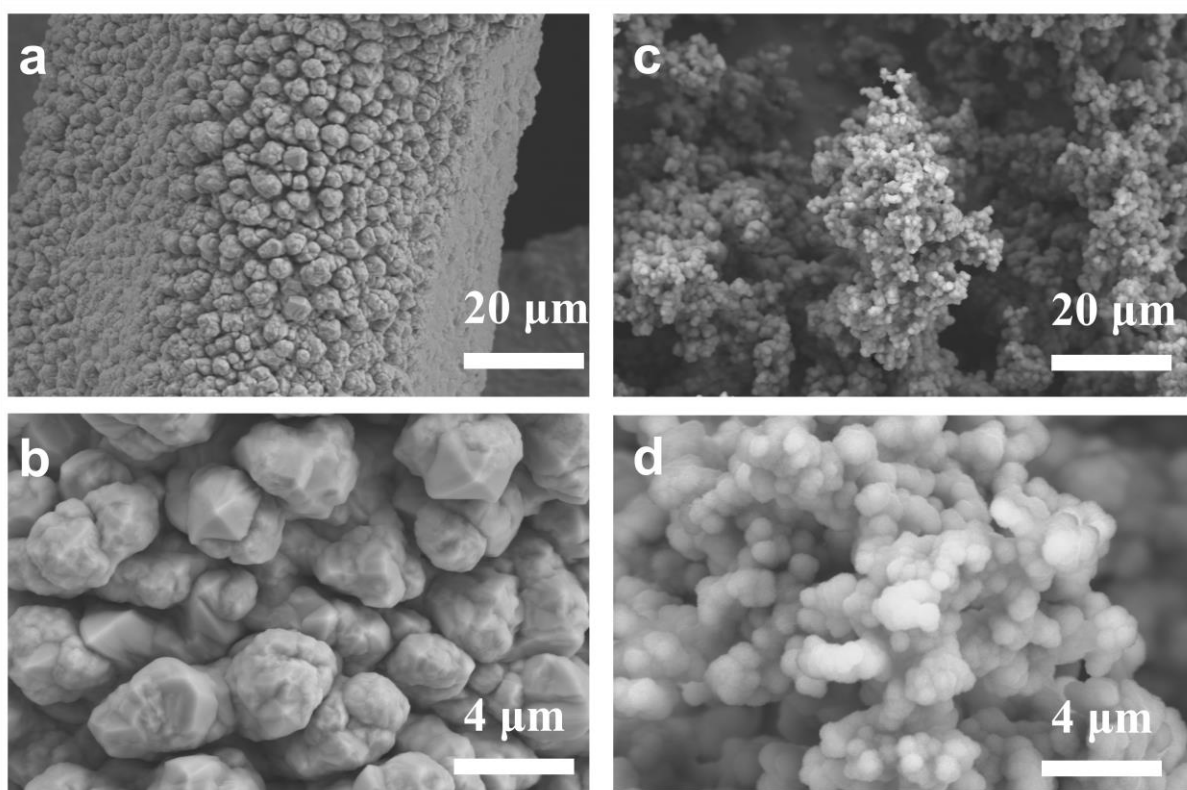

**Figure S6.** SEM images of (a, e) 5E-CF and (c, d) 9H5E-CF before polarization.

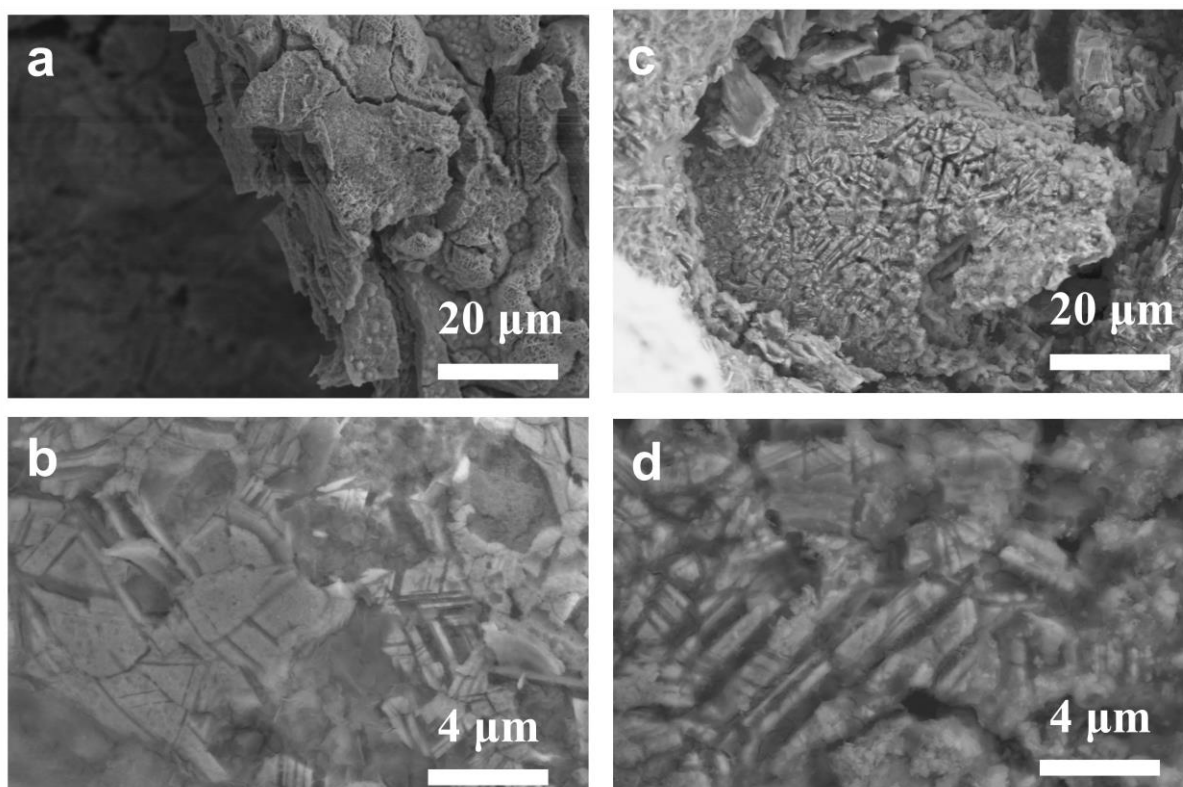

Figure S7. SEM images of 9H5E-CF (c, g) before and (c, d) after running chronopotentiometry.

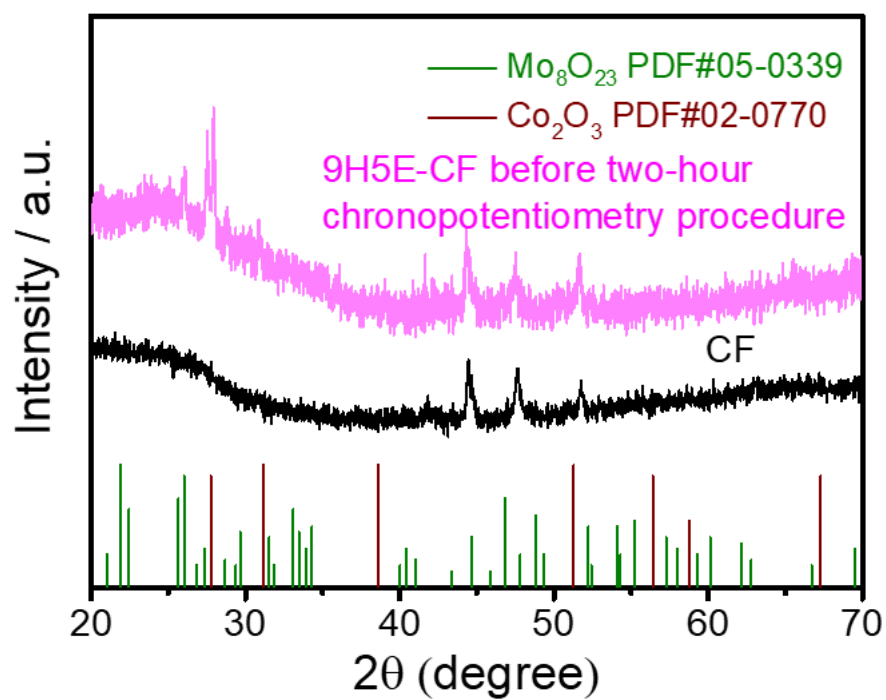

Figure S8. XRD of 9H5E-CF before 2 h-chronopotentiometry procedure.

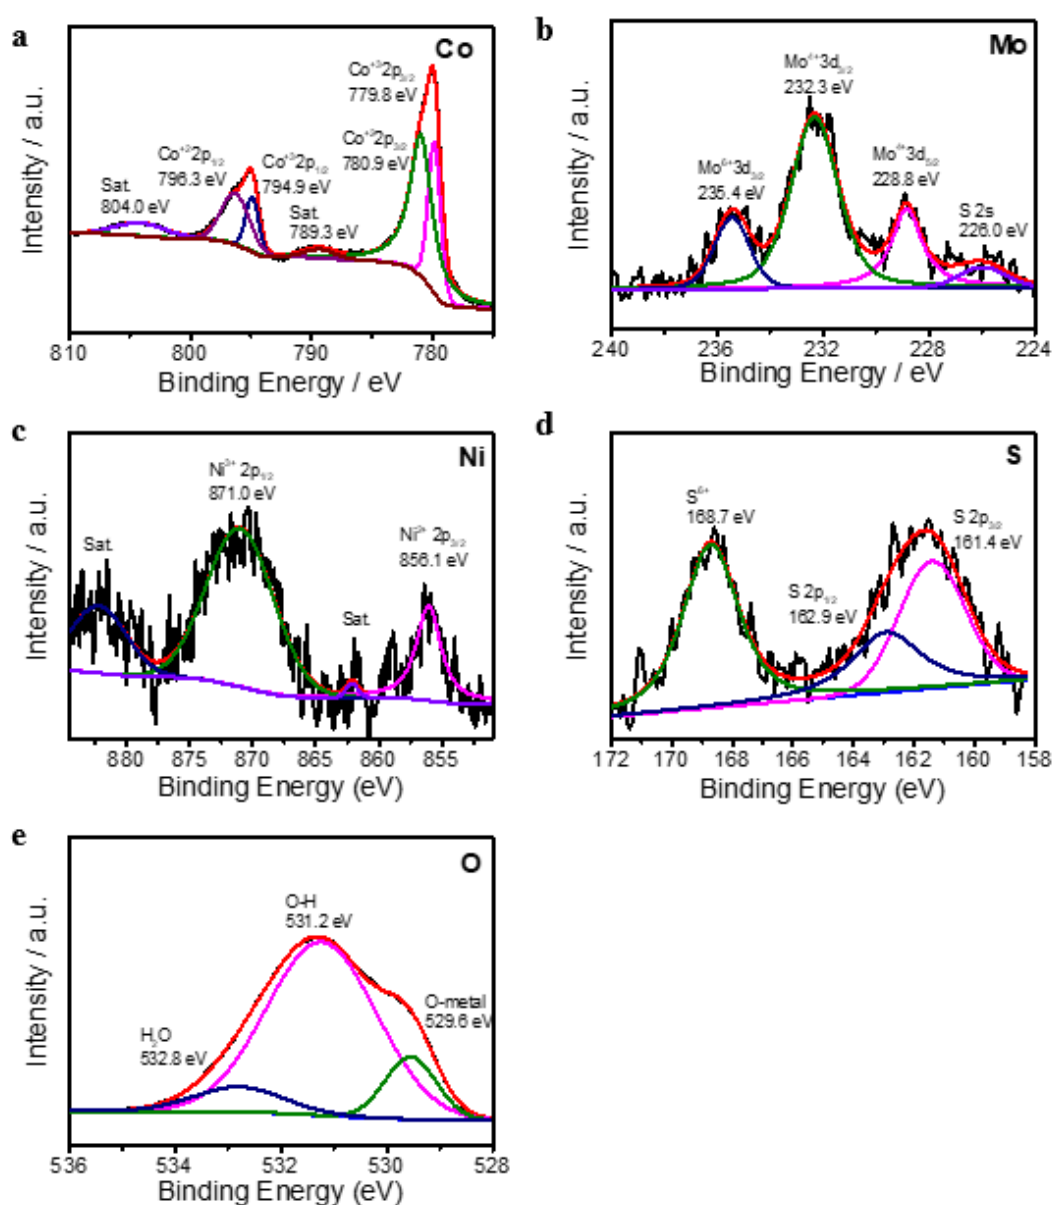

**Figure S9.** XPS spectra of (a) Co element (b) Mo element (c) Ni element (d) O element (e) S element for 9H5E-CF.

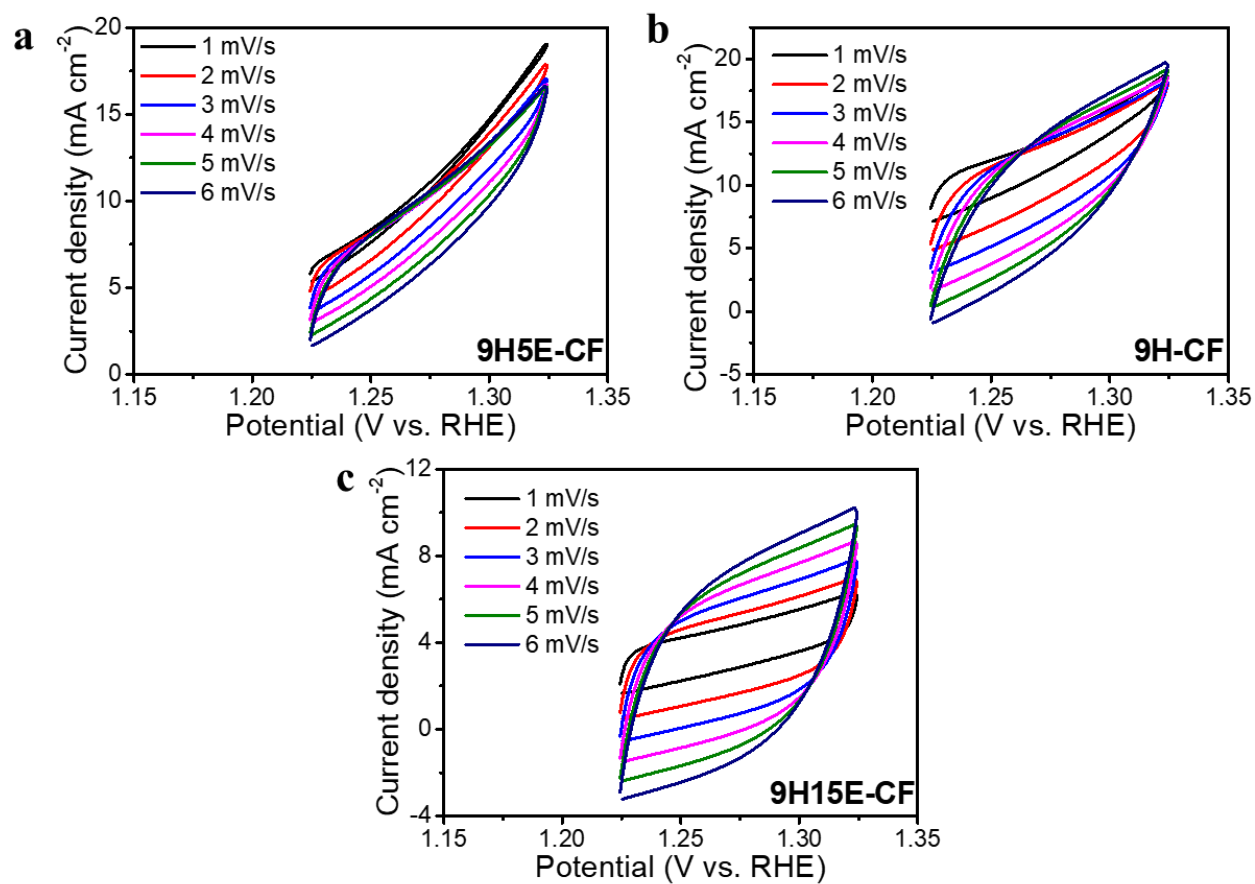

**Figure S10.** CV curves showing the capacitive of  $C_{dl}$  of (a) 9H5E-CF, (b) 9H-CF, and (c) 9H15E-CF.



**Table S1.** Listing of the experimental parameters for fabricating the samples.

| Samples  | Substrate | Experimental parameters                |                                                                                                                          |
|----------|-----------|----------------------------------------|--------------------------------------------------------------------------------------------------------------------------|
|          |           | Electrodeposition time<br>(at −100 mA) | Hydrothermal reaction solution<br>(180 °C for 9 h)                                                                       |
| CC       | CC        |                                        |                                                                                                                          |
| 5E-CC    | CC        | 5 min                                  |                                                                                                                          |
| 9H5E-CC  | CC        | 5 min                                  | 0.5 M CH <sub>4</sub> N <sub>2</sub> S, 0.01 M (NH <sub>4</sub> ) <sub>2</sub> MoS <sub>4</sub> , 50 mL H <sub>2</sub> O |
| 9H1-CC   | CC        |                                        | 0.5 M CH <sub>4</sub> N <sub>2</sub> S, 50 mL H <sub>2</sub> O                                                           |
| 9H15E-CC | CC        | 5 min                                  | 0.5 M CH <sub>4</sub> N <sub>2</sub> S, 50 mL H <sub>2</sub> O                                                           |
| 9H-CC    | CC        |                                        | 0.5 M CH <sub>4</sub> N <sub>2</sub> S, 0.01 M (NH <sub>4</sub> ) <sub>2</sub> MoS <sub>4</sub> , 50 mL H <sub>2</sub> O |
| 9H25E-CC | CC        | 5 min                                  | 0.01 M (NH <sub>4</sub> ) <sub>2</sub> MoS <sub>4</sub> , 50 mL H <sub>2</sub> O                                         |
| 9H2-CC   | CC        |                                        | 0.01 M (NH <sub>4</sub> ) <sub>2</sub> MoS <sub>4</sub> , 50 mL H <sub>2</sub> O                                         |
| CF       | CF        |                                        |                                                                                                                          |
| 5E-CF    | CF        | 5 min                                  |                                                                                                                          |
| 9H5E-CF  | CF        | 5 min                                  | 0.5 M CH <sub>4</sub> N <sub>2</sub> S, 0.01 M (NH <sub>4</sub> ) <sub>2</sub> MoS <sub>4</sub> , 50 mL H <sub>2</sub> O |
| 9H1-CF   | CF        |                                        | 0.5 M CH <sub>4</sub> N <sub>2</sub> S, 50 mL H <sub>2</sub> O                                                           |
| 9H15E-CF | CF        | 5 min                                  | 0.5 M CH <sub>4</sub> N <sub>2</sub> S, 50 mL H <sub>2</sub> O                                                           |
| 9H-CF    | CF        |                                        | 0.5 M CH <sub>4</sub> N <sub>2</sub> S, 0.01 M (NH <sub>4</sub> ) <sub>2</sub> MoS <sub>4</sub> , 50 mL H <sub>2</sub> O |
| 9H25E-CF | CF        | 5 min                                  | 0.01 M (NH <sub>4</sub> ) <sub>2</sub> MoS <sub>4</sub> , 50 mL H <sub>2</sub> O                                         |
| 9H2-CF   | CF        |                                        | 0.01 M (NH <sub>4</sub> ) <sub>2</sub> MoS <sub>4</sub> , 50 mL H <sub>2</sub> O                                         |

**Table S2.** R<sub>s</sub> and R<sub>ct</sub> value of 9H5E-CC, 9H-CC and 9H15-CC.

| Electrode | R <sub>s</sub> | R <sub>ct</sub> (Ω) |
|-----------|----------------|---------------------|
| 9H5E-CC   | 2.145          | 1.325               |
| 9H-CC     | 2.061          | 1.799               |
| 9H15E-CC  | 2.146          | 1.377               |

**Table S3.** R<sub>s</sub> and R<sub>ct</sub> value of 9H5E-CF, 9H-CF and 9H15-CF.

| Electrode | R <sub>s</sub> | R <sub>ct</sub> (Ω) |
|-----------|----------------|---------------------|
| 9H5E-CF   | 1.614          | 1.527               |
| 9H-CF     | 1.909          | 2.301               |
| 9H15-CF   | 1.757          | 1.653               |



**Table S4.** Comparison of the water splitting performance of the catalyst in this work with other reported bifunctional catalysts in 1 M KOH (References [39–51] are cited in the supplementary materials).

| Catalysts                                                                                   | Overpotential of HER           | Overpotential of OER            | Voltage of overall water splitting at current density j | Ref.      |
|---------------------------------------------------------------------------------------------|--------------------------------|---------------------------------|---------------------------------------------------------|-----------|
| MoO <sub>3</sub> -NiS <sub>x</sub>                                                          | $\eta_{10} = 142 \text{ mV}$   | $\eta_{50} = 294 \text{ mV}$    | $\eta_{50} = 1.88 \text{ V}$                            | This work |
| MoS <sub>2</sub> @Ni <sub>9</sub> S <sub>8</sub> /Co <sub>3</sub> S <sub>4</sub>            | $\eta_{10} = 81.24 \text{ mV}$ | $\eta_{50} = 159.67 \text{ mV}$ | $\eta_{10} = 1.45 \text{ V}$                            | 1         |
| CoS <sub>2</sub> /MoS <sub>2</sub>                                                          | $\eta_{10} = 53 \text{ mV}$    | $\eta_{10} = 255 \text{ mV}$    | $\eta_{10} = 1.55 \text{ V}$                            | 2         |
| Li- $\alpha$ -MoO <sub>3</sub> /CFP                                                         |                                | $\eta_{10} = 458 \text{ mV}$    |                                                         | 3         |
| Co <sub>3</sub> (PO <sub>4</sub> ) <sub>2</sub> -MoO <sub>3</sub> -x/CoMoO <sub>4</sub> /NF | $\eta_{100} = 76 \text{ mV}$   |                                 |                                                         | 4         |
| Fe-NiCoP-MoO <sub>3</sub>                                                                   | $\eta_{10} = 65 \text{ mV}$    | $\eta_{50} = 293 \text{ mV}$    | $\eta_{10} = 1.586 \text{ V}$                           | 5         |
| p-MoS <sub>2</sub> /NiS <sub>2</sub>                                                        | $\eta_{10} = 155 \text{ mV}$   | $\eta_{100} = 337 \text{ mV}$   | $\eta_{10} = 1.51 \text{ V}$                            | 6         |
| NiS/FeS <sub>2</sub>                                                                        | $\eta_{10} = 148 \text{ mV}$   | $\eta_{10} = 183 \text{ mV}$    | $\eta_{10} = 1.56 \text{ V}$                            | 7         |
| ZnNiS-3                                                                                     | $\eta_{10} = 208 \text{ mV}$   | $\eta_{50} = 302 \text{ mV}$    | $\eta_{50} = 1.71 \text{ V}$                            | 8         |
| CoS/NiS@CuS                                                                                 | $\eta_{10} = 110 \text{ mV}$   |                                 |                                                         | 9         |
| NiO/Co <sub>2</sub> P NSs                                                                   | $\eta_{10} = 108 \text{ mV}$   | $\eta_{10} = 207 \text{ mV}$    | $\eta_{10} = 1.57 \text{ V}$                            | 10        |
| FeS/NiS and Ni/NiO                                                                          | $\eta_{10} = 84 \text{ mV}$    | $\eta_{10} = 168 \text{ mV}$    | $\eta_{10} = 1.47 \text{ V}$                            | 11        |
| NiS/NiCo <sub>2</sub> S <sub>4</sub>                                                        | $\eta_{10} = 198 \text{ mV}$   | $\eta_{10} = 259 \text{ mV}$    |                                                         | 12        |
| NiS/N-C                                                                                     | $\eta_{10} = 88 \text{ mV}$    | $\eta_{10} = 170 \text{ mV}$    | $\eta_{10} = 1.51 \text{ V}$                            | 13        |

## References

- Pei, Z.; Qin, T.; Tian, R.; Ou, Y.; Guo, X. Construction of an Amethyst-like MoS<sub>2</sub>@Ni<sub>9</sub>S<sub>8</sub>/Co<sub>3</sub>S<sub>4</sub> Rod Electrocatalyst for Overall Water Splitting. *Nanomaterials* **2023**, *13*, 2302.
- Qian, Y.; Yu, J.; Zhang, F.; Fei, Z.; Shi, H.; Kang, D.J.; Pang, H. Hierarchical Binary Metal Sulfides Nanoflakes Decorated on Graphene with Precious-Metal-like Activity for Water Electrolysis. *Chem. Eng. J.* **2023**, *470*, 144372.
- Feng, L.; Zhou, J.; Xiao, J.; Chen, F.; Zhao, Z.; Liu, M.; Zhang, N.; Gao, F. Simple Cathodic Deposition of FeS/NiS-Activated Ni/NiO Heterojunctions for High-Concentration Overall Water Splitting Reactions. *Int. J. Hydrogen Energy* **2023**, *48*, 29852–29864.
- Wan, Z.; Zhang, Y.; Ren, Q.; Li, X.; Yu, H.; Zhou, W.; Ma, X.; Xuan, C. Interface Engineering of NiS/NiCo<sub>2</sub>S<sub>4</sub> Heterostructure with Charge Redistribution for Boosting Overall Water Splitting. *J. Colloid Interface Sci.* **2024**, *653*, 795–806.
- Liu, Z.; Jia, H.; Wang, H.; Wang, Y.; Zhang, G. Constructing S-Deficient Nickel Sulfide/N-Doped Carbon Interface for Improved Water Splitting Activity. *Nanoscale* **2023**, 16039–16048.
- Kim, K.H.; Hong, D.; Kim, M.G.; Choi, W.; Min, T.; Kim, Y.M.; Choi, Y.H. Improving Electrocatalytic Activity of MoO<sub>3</sub> for the Oxygen Evolution Reaction by Incorporation of Li Ions. *ACS Mater. Lett.* **2023**, *5*, 1196–1201.
- Yang, M.; Shi, B.; Tang, Y.; Lu, H.; Wang, G.; Zhang, S.; Sarwar, M.T.; Tang, A.; Fu, L.; Wu, M.; et al. Interfacial Chemical Bond Modulation of Co<sub>3</sub>(PO<sub>4</sub>)<sub>2</sub>-MoO<sub>3-x</sub> Heterostructures for Alkaline Water/Seawater Splitting. *Inorg. Chem.* **2023**, *62*, 2838–2847.
- Guo, F.; Li, W.; Liu, Y.; Chen, Q.; Zhong, Q. Heterogeneous Fe-Doped NiCoP-MoO<sub>3</sub> Efficient Electrocatalysts for Overall Water Splitting. *Langmuir* **2023**, *39*, 1042–1050.
- Yu, N.; Ke, H.; Yu, H.; Wu, X.; Li, S.; Chen, G.; Wang, J.; Cai, N.; Xue, Y.; Yu, F. Polysulfide-Induced Synthesis of Coral-Like MoS<sub>2</sub>/NiS<sub>2</sub> Nanostructures for Overall Water Splitting. *ACS Appl. Nano Mater.* **2023**, *6*, 5136–5144.
- Yu, X.; Mei, J.; Du, Y.; Cheng, X.; Wang, X.; Wu, Q. Engineered Interface of Three-Dimensional Coralliform NiS/FeS<sub>2</sub> Heterostructures for Robust Electrocatalytic Water Cleavage. *Nano Res.* **2023**, *5*, 740–9.
- Prakash, C.; Sahoo, P.; Yadav, R.; Pandey, A.; Singh, V.K.; Dixit, A. Nanoengineered Zn-Modified Nickel Sulfide (NiS) as a Bifunctional Electrocatalyst for Overall Water Splitting. *Int. J. Hydrogen Energy* **2023**, *48*, 21969–21980.

12. Wang, Q.; Du, X.; Zhang, X. Construction of CoS/NiS@CuS with Dandelion Flower-like Heterostructures as Efficient Catalysts for Overall Urea Splitting. *Int. J. Hydrogen Energy* **2023**, *48*, 24342–24355.
13. Tong, X.; Liao, W.; Zhai, Y.; Liu, P.; Yang, Q.; Chen, T. NiO/Co<sub>2</sub>P Nanosheets with Heterogeneous Structure as a Multifunctional Catalyst for Overall Water Splitting. *J. Electrochem. Soc.* **2023**, *170*, 063509.

**Disclaimer/Publisher's Note:** The statements, opinions and data contained in all publications are solely those of the individual author(s) and contributor(s) and not of MDPI and/or the editor(s). MDPI and/or the editor(s) disclaim responsibility for any injury to people or property resulting from any ideas, methods, instructions or products referred to in the content.
